# Supplementary material
Source: PubMed Central journal article supplement (PMC3856684)
Supplement: NIHMS512385-supplement-Supplementary_Table_1.pdf [file NIHMS512385-supplement-Supplementary_Table_1.pdf]

# SUPPLEMENTARY TABLE 1

|                          |                          |                     |                     |                     |
|--------------------------|--------------------------|---------------------|---------------------|---------------------|
| AKT1_E17K_G49A           | CTNNB1_S33_97T           | KRAS_G13_38G        | PIK3CA_E110K        | PIK3R1_N564K        |
| AKT1_G173R_G517C         | CTNNB1_S37_109T          | KRAS_Q61_181C       | PIK3CA_E418K        | PRKAG1_R70Q         |
| AKT1_K179M_A536T         | CTNNB1_S33_97T           | KRAS_Q61_183A       | PIK3CA_E453K        | PRKAG2_N488I        |
| AKT2_G175R_G523C         | CTNNB1_S37_109T          | MEK1_D67N_G119A     | PIK3CA_E542_1624G   | RET_M018T           |
| AKT3_E17K_G49K           | CTNNB1_S37_110C          | MET_H1112_3335      | PIK3CA_E542_1625A   | Rictor_M675I_G2025A |
| AKT3_G171R_G511A         | CTNNB1_S45_133T          | MET_H1112Y_C3334T   | PIK3CA_E545_1633G   | Rictor_S159F_C476T  |
| ALK_I174I_T3520A         | CTNNB1_S45_134C          | MET_M1268T_T3803C   | PIK3CA_E545_1634A   | STK11_D194_A591T    |
| ALK_A877S_G2G29T         | Dear1_new                | MET_NB48S           | PIK3CA_E545_1635G   | STK11_D194_G590     |
| ALK_D1091N_G3271A        | EGFR_G719_G2155          | MET_R988C           | PIK3CA_F909L        | STK11_F354L_C1062G  |
| ALK_F1245C_T3734G        | EGFR_K860I_A2579T        | MET_T1010I_C3029T   | PIK3CA_G1049R       | STK11_P281I_C842T   |
| ALK_F1245V_T3734G        | EGFR_L858R_TG            | MET_Y1248_T3742     | PIK3CA_H1047        | KIT_D816H_GC        |
| ALK_I1171N_T3512A        | EGFR_S720P_T2158C        | MET_Y1253D_T3757G   | PIK3CA_H1047_1      | KIT_D816V_AT        |
| ALK_I150T_T3749C         | EGFR_T790M_C2369T_Splice | NRAS_G12_G34        | PIK3CA_H1047Y       | KIT_K642E_AG        |
| ALK_L560F_G1680C         | EGFR_T854I_C2561T        | NRAS_G12_G35        | PIK3CA_H701P        | KIT_L576P_TC        |
| ALK_M1166R_T3497G        | EGFR_Y813C_A2438G        | NRAS_G13_G38        | PIK3CA_K111N        | KIT_N556D_AG        |
| ALK_R1275Q               | ERa_G400V                | NRAS_Q61_A182       | PIK3CA_M1043I_G3129 | KIT_R634W_CT        |
| BRAF_D594_1781A          | FRAP_M135T_T404C         | NRAS_Q61_A183       | PIK3CA_M1043V       | KIT_V559_T          |
| BRAF_E586K_1756GA_SPLICE | GNAS_Q227_C65I           | NRAS_Q61_C18I       | PIK3CA_N345K        | KIT_V560D_TA_SPLICE |
| BRAF_G466_1397G          | GNAS_R201_C60I           | PDGFRA_D842_A2525T  | PIK3CA_P539R        | KIT_V825A_TC        |
| BRAF_G466R_1396_GC       | HIF1A_Q697E_C2089G       | PDGFRA_D842_G2524   | PIK3CA_Q060K        | KIT_Y553N_TA        |
| BRAF_G469_1407A          | IDH1_R132_C394T          | PDGFRA_E996K_G2986  | PIK3CA_Q546_1636C   |                     |
| BRAF_K601E_AG            | IDH1_R132_G295T          | PDGFRA_N659K_C1977A | PIK3CA_Q546_1637A1  |                     |
| BRAF_L597R_1790TG        | IDH2_R172_A514T          | PDGFRA_N659Y_A1975T | PIK3CA_R088Q        |                     |
| BRAF_V600_1798G_1        | IDH2_R172_G515           | PDGFRA_V561D_T1682A | PIK3CA_S405F        |                     |
| BRAF_V600_1799T_2        | JAK2_V617F_G1849T        | PDGFRA_V824L_G2470C | PIK3CA_T1025_3073A  |                     |
| BRAF_V600_1800G          | KRAS_A146_436            | PDPK1_D527E_C1581G  | PIK3CA_Y1021_3061T  |                     |
| CDK4_R24C_C70T_2         | KRAS_G10R                | PDPK1_T354M_C1061T  | PIK3CA_Y1021C_3062  |                     |
| CDK4_R24H_G71A           | KRAS_G12_34G             | PIK3CA_A1046V       | PIK3R1_D560Y        |                     |
| CTNNB1_D32_94G           | KRAS_G12_35G             | PIK3CA_C420R        | PIK3R1_intron1      |                     |
| CTNNB1_G34_101G          | KRAS_G13_37G             | PIK3CA_C420R_2      | PIK3R1_intron2      |                     |
