# Supplementary material
Source: PubMed Central journal article supplement (PMC3856684)

# Supplementary Figure 1

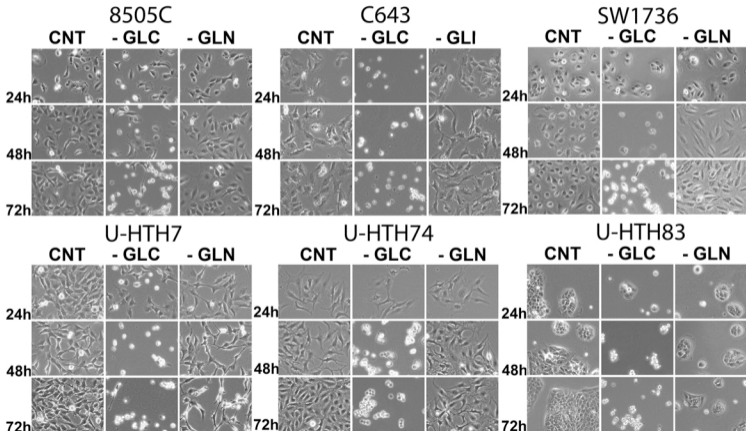

Supplement: NIHMS512385-supplement-Supplementary_Figure_1.pdf [file NIHMS512385-supplement-Supplementary_Figure_1.pdf]

# Supplementary Figure 2

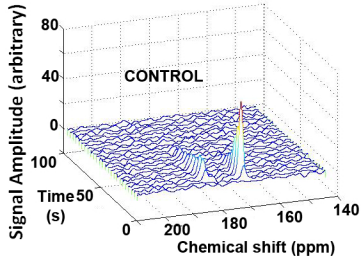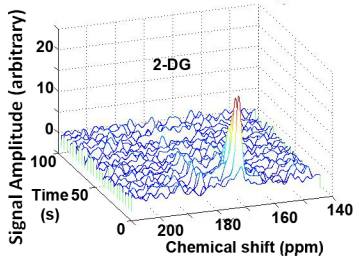

Supplement: NIHMS512385-supplement-Supplementary_Figure_2.pdf [file NIHMS512385-supplement-Supplementary_Figure_2.pdf]
